# Supplementary material
Source: PubMed Central journal article supplement (PMC10984724)
Supplement: NIHMS1974279-supplement-Supporting_Information.pdf [file NIHMS1974279-supplement-Supporting_Information.pdf]

# SUPPLEMENTARY MATERIAL

## Robust cardiac $T_{1\rho}$ mapping at 3T using adiabatic spin-lock preparations

Chiara Coletti<sup>1</sup>, Anastasia Fotaki<sup>2</sup>, Joao Tourais<sup>1</sup>, Yidong Zhao<sup>1</sup>, Christal van de Steeg-Henzen<sup>3</sup>, Mehmet Akçakaya<sup>4</sup>, Qian Tao<sup>1</sup>, Claudia Prieto<sup>2,5,6</sup>, Sebastian Weingärtner<sup>1</sup>

<sup>1</sup>Department of Imaging Physics, Delft University of Technology, Delft, The Netherlands

<sup>2</sup>Department of Biomedical Engineering, King's College London, London, United Kingdom

<sup>3</sup>HollandPTC, Delft, The Netherlands

<sup>4</sup>Department of Electrical and Computer Engineering and Center for Magnetic Resonance Research, University of Minnesota, Minnesota, USA

<sup>5</sup>School of Engineering, Pontificia Universidad Católica de Chile, Santiago, Chile

<sup>6</sup>Millenium Institute for Intelligent Healthcare Engineering, Santiago, Chile

## INDEX OF SUPPLEMENTARY FIGURES

|                                                                                                        |   |
|--------------------------------------------------------------------------------------------------------|---|
| S1: Rest period for longitudinal magnetization recovery . . . . .                                      | 2 |
| S2: Phantom $T_{1\rho, \text{adiab}}$ and $T_{1\rho}$ maps, average values and repeatability . . . . . | 3 |
| S3: Patients $T_{1\rho, \text{adiab}}$ maps: aSL preparations comparison . . . . .                     | 4 |

## INDEX OF SUPPLEMENTARY TABLES

|                                                                                                          |   |
|----------------------------------------------------------------------------------------------------------|---|
| S1: Results healthy subjects cohort 1: $T_{1\rho, \text{adiab}}$ . . . . .                               | 5 |
| S2: Results healthy subjects cohort 1: precision, reproducibility and inter-subject variability. . . . . | 5 |
| S3: Results healthy subjects cohort 2: $T_{1\rho, \text{adiab}}$ and $T_{1\rho}$ . . . . .               | 5 |
| S4: Results healthy subjects cohort 2: precision, reproducibility and inter-subject variability. . . . . | 5 |

## Phantom experiments: $M_z$ recovery vs. $T_{1\rho, \text{adiab}}$

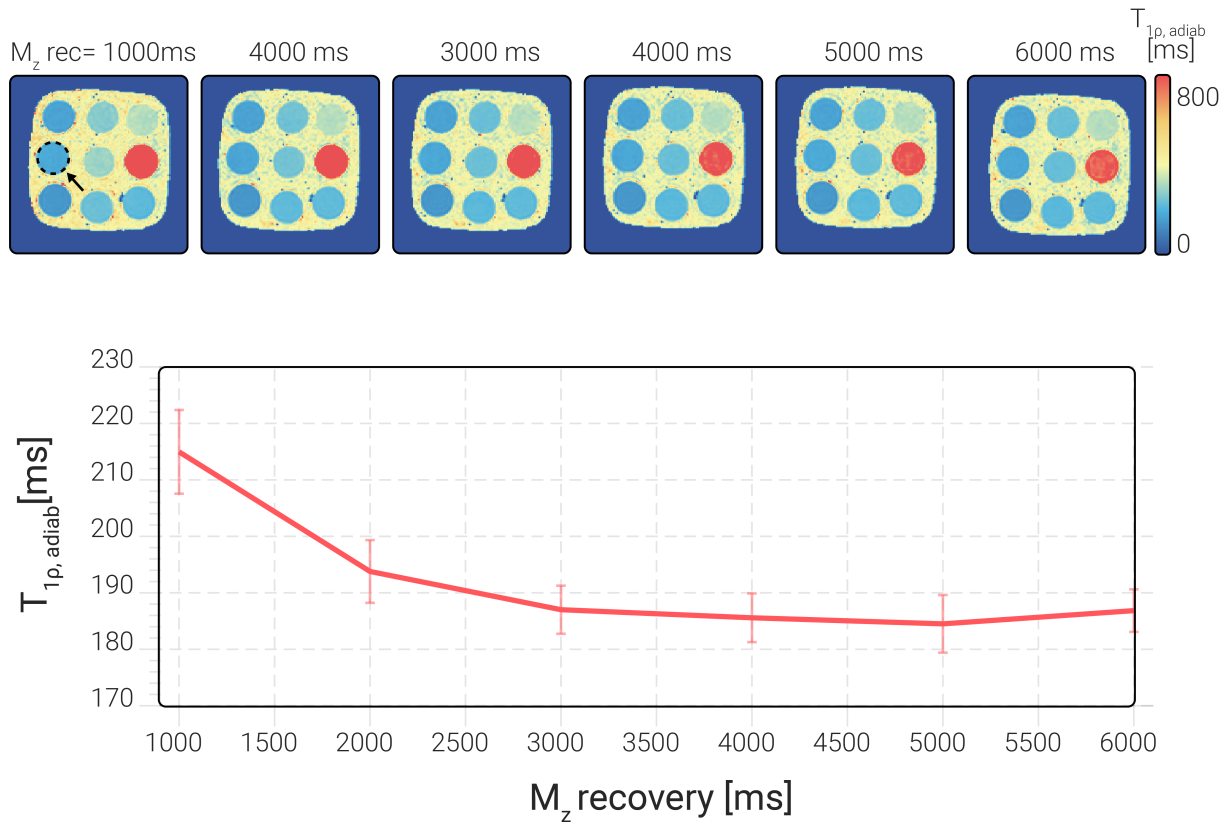

**FIGURE S1:** Phantom  $T_{1\rho, \text{adiab}}$  maps acquired with different rest periods for longitudinal magnetization recovery delays.  $T_{1\rho, \text{adiab}}$  values ( $\pm$  standard deviation) reported in the plot are measured from the normal myocardium-mimicking vial (left column, middle row). For longitudinal magnetization recovery delays  $\geq 3000\text{ms}$ , the measured  $T_{1\rho, \text{adiab}}$  values deviate less than 5% from the asymptotic value.

### A. Phantom $T_{1\rho}$ maps

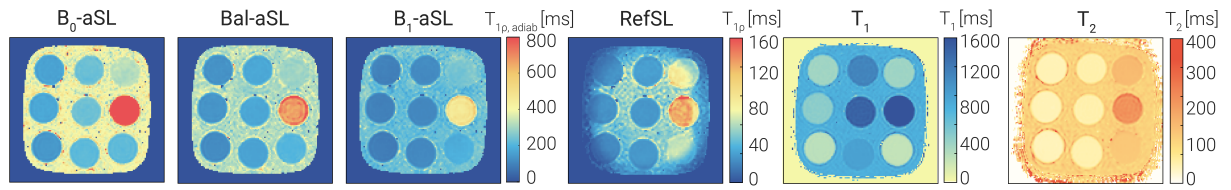

### B. Average phantom $T_{1\rho}$ (10 repetitions)

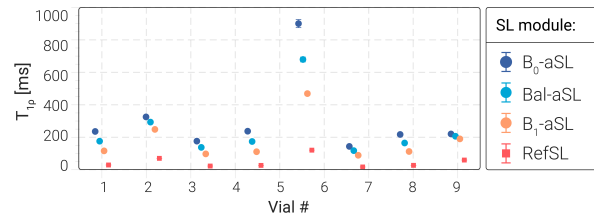

### C. Repeatability (coefficient of variability)

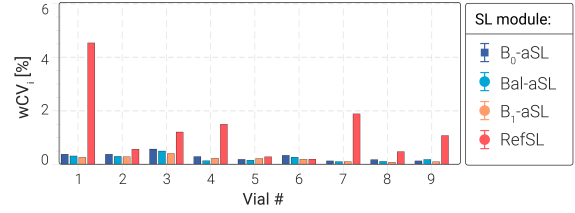

**FIGURE S2:** (A) Example of  $T_{1\rho, \text{adiab}}$  and  $T_{1\rho}$  maps of the tissue-mimicking T1MES phantom. Good map quality was achieved with aSL preparations, whereas visible artifacts are apparent in most vials in the maps obtained with RefSL preparation. Approximate  $T_1$  and  $T_2$  maps are displayed for reference. (B)  $T_{1\rho, \text{adiab}}$  and  $T_{1\rho}$  values with standard deviation bars for each vial, averaged over 10 repetitions.  $T_{1\rho, \text{adiab}}$  values are consistently higher than  $T_{1\rho}$  values measured with RefSL preparations.  $T_{1\rho, \text{adiab}}$  dispersion is observed across  $B_0$ , Bal and  $B_1$  optimized pulses, due to a progressively lower  $\beta$  value. (C) Repeatability measured as the coefficient of variability ( $wCV_i$ ) for each vial. Averaging across all the vials, aSL preparations yielded significantly improved repeatability ( $wCV_i = 0.29 \pm 0.15$  for  $B_0$ -aSL,  $p < 0.01$ ;  $wCV_i = 0.23 \pm 0.13$  for Bal-aSL,  $p < 0.01$ ;  $wCV_i = 0.21 \pm 0.11$  for  $B_1$ -aSL,  $p < 0.001$  vs.  $wCV_i = 1.30 \pm 1.34$  for RefSL).

## A. Patient 1

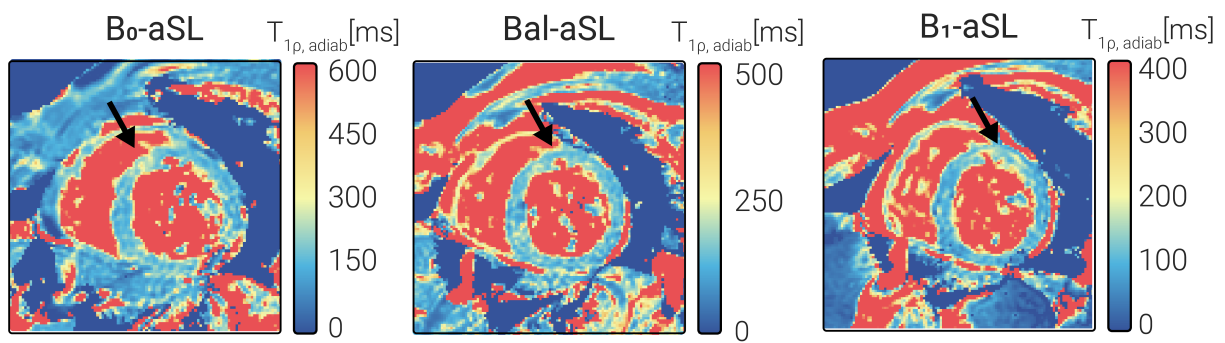

## B. Patient 2

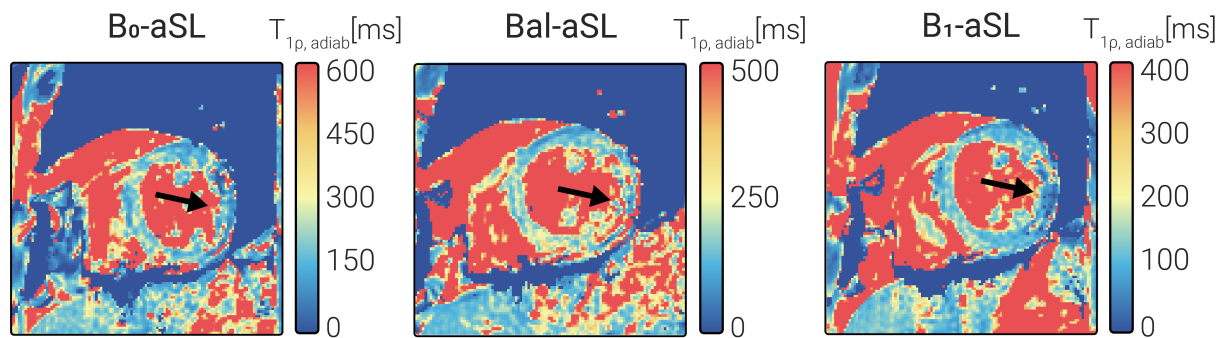

**FIGURE S3:**  $T_{1\rho, \text{adiab}}$  maps obtained with  $B_0\text{-aSL}$ ,  $Bal\text{-aSL}$  and  $B_1\text{-aSL}$  preparations. Image quality is compromised due to artifacts visible in the maps for  $B_0\text{-aSL}$  in (A) and for  $Bal\text{-aSL}$  in (B). Furthermore  $Bal\text{-aSL}$  prepared baseline images were subject to substantial residual motion in both patients, lowering the image quality.

**TABLE S1:** In-vivo myocardial  $T_{1\rho, \text{adiab}}$  values [ms], averaged over all repetitions and segments for 6 healthy volunteers of cohort 1.

| Subject # | B <sub>0</sub> -aSL | Bal-aSL        | B <sub>1</sub> -aSL |
|-----------|---------------------|----------------|---------------------|
| 1         | 196.41 ± 25.04      | 160.93 ± 15.50 | 93.76 ± 7.99        |
| 2         | 201.99 ± 25.30      | 162.66 ± 18.56 | 92.82 ± 11.00       |
| 3         | 197.61 ± 23.06      | 158.34 ± 17.04 | 92.70 ± 10.78       |
| 4         | 181.04 ± 24.73      | 139.07 ± 19.58 | 73.51 ± 14.42       |
| 5         | 190.37 ± 22.93      | 161.74 ± 15.86 | 92.83 ± 9.25        |
| 6         | 197.89 ± 26.17      | 150.82 ± 21.99 | 79.25 ± 15.89       |

**TABLE S2:** In-vivo myocardial  $T_{1\rho, \text{adiab}}$  precision, reproducibility and inter-subject variability (ISV), averaged over segments and repetitions for 6 healthy volunteers of cohort 1.

| S. #   | B <sub>0</sub> -aSL |            | Bal-aSL    |            | B <sub>1</sub> -aSL |            |
|--------|---------------------|------------|------------|------------|---------------------|------------|
|        | Prec. [%]           | Reprod [%] | Prec. [%]  | Reprod [%] | Prec. [%]           | Reprod [%] |
| 1      | 12.84±4.55          | 2.79±2.37  | 9.72±2.43  | 1.95±1.40  | 8.70±3.91           | 2.52±1.77  |
| 2      | 12.86±5.72          | 1.74±1.80  | 11.94±7.27 | 2.70±2.35  | 12.60±10.26         | 4.17±4.69  |
| 3      | 11.83±3.64          | 2.67±2.32  | 11.16±5.92 | 2.80±3.18  | 12.26±9.92          | 2.77±2.83  |
| 4      | 13.87±3.18          | 2.54±1.57  | 14.32±3.24 | 5.21±3.33  | 22.53±17.02         | 9.94±14.85 |
| 5      | 12.19±3.91          | 8.09±7.17  | 9.94±3.34  | 2.35±2.46  | 10.51±7.22          | 5.28±4.03  |
| 6      | 13.55±5.48          | 4.60±2.88  | 15.27±7.53 | 7.52±3.66  | 22.29±13.69         | 7.04±5.20  |
| ISV[%] | 5.32±3.01           |            | 6.40±2.66  |            | 9.25±6.10           |            |

**TABLE S3:** In-vivo myocardial  $T_{1\rho, \text{adiab}}$  and  $T_{1\rho}$  values [ms], averaged over all repetitions and segments for 7 healthy volunteers of cohort 2.

| Subject # | B <sub>0</sub> -aSL | RefSL         |
|-----------|---------------------|---------------|
| 1         | 196.41 ± 25.04      | 23.27 ± 25.05 |
| 2         | 201.99 ± 25.30      | 43.88 ± 46.04 |
| 3         | 197.61 ± 23.06      | 26.45 ± 13.50 |
| 4         | 181.04 ± 24.73      | 21.22 ± 29.12 |
| 5         | 190.37 ± 22.93      | 33.84 ± 23.42 |
| 6         | 197.89 ± 26.17      | 58.91 ± 32.78 |
| 7         | 181.25 ± 21.18      | 39.65 ± 29.42 |

**TABLE S4:** In-vivo myocardial  $T_{1\rho, \text{adiab}}$  and  $T_{1\rho}$  precision, reproducibility and inter-subject variability (ISV), averaged over segments and repetitions for 7 healthy volunteers of cohort 2.

| S. #   | B <sub>0</sub> -aSL |            | RefSL       |             |
|--------|---------------------|------------|-------------|-------------|
|        | Prec. [%]           | Reprod [%] | Prec. [%]   | Reprod [%]  |
| 1      | 12.84±4.55          | 2.79±2.37  | 38.72±25.56 | 29.15±23.26 |
| 2      | 18.86±5.72          | 1.74±1.80  | 69.46±38.78 | 59.35±24.41 |
| 3      | 11.83±3.64          | 2.67±2.32  | 54.81±28.70 | 28.31±24.14 |
| 4      | 15.87±3.18          | 2.54±1.57  | 26.13±39.69 | 57.65±25.94 |
| 5      | 12.19±3.91          | 8.09±7.17  | 34.92±20.38 | 27.85±16.20 |
| 6      | 13.55±5.48          | 4.60±2.88  | 28.40±26.49 | 40.20±23.70 |
| 7      | 11.19±3.28          | 2.96±3.05  | 43.81±19.70 | 24.76±24.14 |
| ISV[%] | 5.32±3.01           |            | 51.92±6.10  |             |
